# 1 Low generalizability of polygenic scores in African 2 populations due to genetic and environmental diversity

3 Lerato Majara<sup>1,2</sup>, Allan Kalungi<sup>1,3,4,5</sup>, Nastassja Koen<sup>1,6,7</sup>, Heather Zar<sup>8</sup>, Dan J. Stein<sup>6,7</sup>, Eugene Kinyanda<sup>5</sup>,  
4 Elizabeth G. Atkinson<sup>9,10,11</sup>, Alicia R. Martin<sup>9,10,11</sup>

5  
6 <sup>1</sup> Global Initiative for Neuropsychiatric Genetics Education in Research (GINGER), Harvard T.H. Chan School  
7 of Public Health, Department of Epidemiology, Boston, MA, USA

8 <sup>2</sup> MRC Human Genetics Research Unit, Division of Human Genetics, Institute of Infectious Disease and  
9 Molecular Medicine, Faculty of Health Sciences, University of Cape Town, Observatory 7925, South Africa

10 <sup>3</sup> Department of Psychiatry, College of Health Sciences, Makerere University, Kampala, Uganda.

11 <sup>4</sup> Department of Psychiatry, Faculty of Medicine and Health Sciences, Stellenbosch University, Cape Town,  
12 South Africa.

13 <sup>5</sup> Mental Health Project, Medical Research Council/Uganda Virus Research Institute (MRC/UVRI) & London  
14 School of Hygiene and Tropical Medicine (LSHTM), Uganda Research Unit, Entebbe, Uganda

15 <sup>6</sup> Department of Psychiatry and Neuroscience Institute, University of Cape Town, Cape Town, South Africa

16 <sup>7</sup> South African Medical Research Council (SAMRC) Unit on Risk and Resilience in Mental Disorders, Cape  
17 Town, South Africa

18 <sup>8</sup> Department of Paediatrics and Child Health, Red Cross Children's Hospital and Medical Research Council  
19 Unit on Child and Adolescent Health, University of Cape Town, Cape Town, South Africa.

20 <sup>9</sup> Analytic and Translational Genetics Unit, Massachusetts General Hospital, Boston, MA 02114, USA

21 <sup>10</sup> Stanley Center for Psychiatric Research, Broad Institute of MIT and Harvard, Cambridge, MA 02142, USA

22 <sup>11</sup> Program in Medical and Population Genetics, Broad Institute of MIT and Harvard, Cambridge, MA 02142,  
23 USA

24  
25 **Correspondence:** [armartin@broadinstitute.org](mailto:armartin@broadinstitute.org)

26 **Key words:** polygenic scores, Africa, GWAS, health disparities, global health, population genetics

## 27 Abstract

28  
29 African populations are vastly underrepresented in genetic studies but have the most genetic variation and  
30 face wide-ranging environmental exposures globally. Because systematic evaluations of genetic prediction had  
31 not yet been conducted in ancestries that span African diversity, we calculated polygenic risk scores (PRS) in  
32 simulations across Africa and in empirical data from South Africa, Uganda, and the UK to better understand the  
33 generalizability of genetic studies. PRS accuracy improves with ancestry-matched discovery cohorts more than  
34 from ancestry-mismatched studies. Within ancestrally and ethnically diverse South Africans, we find that PRS  
35 accuracy is low for all traits but varies across groups. Differences in African ancestries contribute more to  
36 variability in PRS accuracy than other large cohort differences considered between individuals in the UK  
37 versus Uganda. We computed PRS in African ancestry populations using existing European-only versus  
38 ancestrally diverse genetic studies; the increased diversity produced the largest accuracy gains for hemoglobin  
39 concentration and white blood cell count, reflecting large-effect ancestry-enriched variants in genes known to  
40 influence sickle cell anemia and the allergic response, respectively. Differences in PRS accuracy across

41 African ancestries originating from diverse regions are as large as across out-of-Africa continental ancestries,  
42 requiring commensurate nuance.  
43

## 44 Introduction

45  
46 Genome-wide association studies (GWAS) have yielded important biological insights into the heritable basis of  
47 many complex traits and diseases (Visscher et al., 2017). However, the vast majority of studies have been  
48 conducted in populations of European descent, raising questions about their utility across diverse populations  
49 (Manrai et al., 2016; Martin et al., 2019; Morales et al., 2018; Popejoy and Fullerton, 2016; Sirugo et al., 2019).  
50 Previous studies have evaluated the generalizability of GWAS by using polygenic risk scores (PRS) to  
51 compare the association between genetically predicted versus measured phenotypes in diverse populations.  
52 These studies have found that PRS accuracy decreases with increasing genetic distance between the GWAS  
53 discovery and PRS target cohorts (Martin et al., 2017, 2019; Scutari et al., 2016). Since the earliest  
54 applications of PRS in human genetics, these concepts--coupled with Eurocentric study biases--have resulted  
55 in PRS that are most accurate in European ancestry populations and least accurate in African ancestry  
56 populations (International Schizophrenia Consortium et al., 2009). These study biases and phenomena  
57 continue to replicate a decade later, with several-fold differences in prediction accuracy of many traits between  
58 European and non-European ancestry populations (Martin et al., 2019).

59  
60 Quantifying PRS generalizability within and among African populations requires considerable nuance as they  
61 represent the most genetically diverse populations globally, with more than a million more genetic variants per  
62 person than out-of-Africa populations (1000 Genomes Project Consortium et al., 2015). Populations collected  
63 even within the same geographic regions of Africa have complex demographic histories with complicated  
64 patterns of admixture and population structure (Busby et al., 2016; Choudhury et al., 2020; Pagani et al., 2015;  
65 Uren et al., 2016). Further, African ancestry populations experience vastly different environments within versus  
66 outside continental Africa as well as more locally among diverse communities, countries, and regions of Africa.  
67 These differences provide unique epidemiological opportunities to query the impacts of vastly differing  
68 environments on PRS accuracy. Previous empirical analyses and theoretical work fundamentally informs how  
69 demographic history and environmental variation interplay to produce PRS heterogeneity in traditionally  
70 underserved populations (Mostafavi et al., 2020; de Vlaming et al., 2017; Wang et al., 2020; Wray et al., 2013;  
71 Zaidi and Mathieson, 2020).

72  
73 The inclusion of African ancestry participants in large-scale genetic studies is uniquely important for many  
74 reasons. They have the lowest life expectancies globally (Hero et al., 2017; Roser, 2013), receive the lowest  
75 access to and quality of medical care in the US (of Health et al., 2017), and are the most underserved by  
76 genetic technologies (Martin et al., 2018; Sirugo et al., 2019). A more nuanced understanding of PRS  
77 transferability will critically inform which populations are currently the most underserved and thus where  
78 building genetic studies and resources will have the biggest benefits globally.

79  
80 There are also clear benefits to including African populations in statistical genetics efforts. Because humans  
81 originated in Africa, populations from Africa have the most genetic diversity among global populations (1000  
82 Genomes Project Consortium et al., 2015; Campbell and Tishkoff, 2008; Henn et al., 2012a), such that more  
83 genotype-phenotype associations are expected in Africa than can be found elsewhere. African Americans have

84 been shown to contribute disproportionately to GWAS findings (Morales et al., 2018), making up 2.8% of  
85 GWAS participants but contributing 7% of trait associations. African ancestry populations also have shorter  
86 blocks of linkage disequilibrium, which improves resolution to fine-map causal variants (Genovese et al., 2010).  
87 PRS accuracy is lowest in African ancestry populations due to GWAS study biases (Martin et al., 2019), but  
88 when GWAS include these and other diverse populations, PRS predict traits such as schizophrenia more  
89 accurately across all populations compared to single-ancestry GWAS (Bigdeli et al., 2019).

90  
91 In this study, we have investigated how PRS generalize within and among diverse African populations in  
92 simulations and with empirical genotype-phenotype data for dozens of quantitative traits. We first simulated  
93 causal effects and computed genetic risk prediction accuracy using data from the African Genome Variation  
94 Project. We then calculated PRS using publicly available GWAS summary statistics from predominantly  
95 European ancestry populations to: 1) quantify PRS accuracy for 5 physical and psychosocial traits among  
96 populations in the Drakenstein Child Health Study (DCHS) of South Africa, a birth cohort study; and 2)  
97 compare PRS accuracy for 34 quantitative traits across the Ugandan General Population Cohort (GPC) versus  
98 ancestrally diverse UK Biobank participants. Our results highlight the disproportionate benefits of genetic  
99 studies in diverse African populations to improve trait prediction. Further, while PRS hold promise as  
100 biomarkers in precision medicine, a critical prerequisite is equitable accuracy in diverse populations to avoid  
101 exacerbating existing health disparities.

## 102 Results

103 Our study uses both simulation-based and empirical approaches to evaluate the generalizability of PRS across  
104 diverse African ancestry populations. An overview of the study design is shown in **Figure 1**, abbreviations are  
105 in **Table S1**, and a summary of datasets used in this study are shown in **Table S2**.

### 106 Simulated generalizability within and across diverse African populations

107 We simulated several quantitative traits with varying numbers of causal variants ( $N = 5; 20; 100; 2,000; 10,000;$   
108 and  $50,000$ ) and heritabilities ( $h^2 = 0.1, 0.2, 0.4, \text{ and } 0.8$ ), then conducted independent GWAS for each  
109 scenario in East and West African ancestry populations (**Methods, Figures S1-4**). We calculated the  
110 prediction accuracy for PRS derived from the GWAS summary statistics considering ten different p-value  
111 thresholds within and across independent target populations from East, West, and South Africa. In general,  
112 ancestry-matched results with the sparsest and most heritable genetic architectures produced the highest  
113 prediction accuracy. Prediction accuracy was highest with trait  $h^2 = 0.8$  and fewer than 100 causal variants  
114 (**Figure 2A-C**), as indicated by the highest  $R^2$  and the identification of genome-wide significant associations.  
115 Conversely, when the number of causal variants exceeded 100, prediction accuracy was negligible (**Figure S4**)  
116 because of the small discovery cohort sample sizes, as evidenced by no variants meeting genome-wide  
117 significance in these simulations.

118  
119 Prediction accuracy was highest with 5 and 20 causal variants (**Figure 2C**). The within-ancestry prediction at  
120 p-value threshold  $< 5e-08$  and five causal variants were:  $R^2 = 0.86, p = 1.74 \times 10^{-74}$  for East discovery - East  
121 target scores;  $R^2 = 0.85, p = 9.9e-74$  for West discovery - West target scores. We observed lower prediction  
122 accuracy with ancestry mismatched discovery versus target cohorts at five causal variants and p-value  
123 threshold  $= 1e-6$  ( $R^2 = 0.66, p = 1.79e-42$  for West discovery - West target scores, compared to  $R^2 = 0.53, p$   
124  $= 1.29e-74$  for East discovery - West target scores). The scores in the South target sample were comparable

125 when using East- or West-derived summary statistics ( $R^2 = 0.86$ ,  $p = 5.19e-84$  for West-derived summary  
126 statistics, and  $R^2 = 0.86$ ,  $p = 1.35e-83$  for East-derived summary statistics).

## 127 PRS accuracies in South African populations

128 While our simulations have shown that PRS generalize poorly across Africa due to substantial genetic diversity  
129 and differences across the continent, there is also considerable genetic and environmental diversity within  
130 regions and countries. We quantified PRS accuracy for a range of measured phenotypes in mothers  
131 genotyped in the DCHS cohort in South Africa, including several sociodemographic, physical/biomedical, and  
132 psychosocial risk traits (**Table S3**). The DCHS cohort consists of participants with multiple ancestry groups that  
133 include an admixed population with ancestry from multiple continents as well as a population with almost  
134 exclusively African population. These ancestry groups correlate with self-reported “Mixed” and “Black/African”  
135 ethnicities, respectively (**Figure S5**). We computed PRS for maternal height, depression, psychological  
136 distress, alcohol consumption, and smoking in DCHS overall, by ethnic group, and by ancestry within the  
137 Mixed ethnic group (**Methods**).

138  
139 Across all genetically predicted phenotypes, only height was significantly predicted (**Figure S6**). We predicted  
140 height more accurately in the Mixed versus Black/African ethnic groups ( $R^2 = 0.099$ , 95% bootstrapped CI =  
141 [0.012, 0.18],  $p = 1.5e-7$  versus  $R^2 = 0.021$ , 95% CI = [-0.031, 0.043],  $p = 5.27e-3$ , respectively). We also expect  
142 that PRS accuracy increases with decreasing African ancestry within the Mixed ethnic group as has been  
143 shown previously in admixed African populations (Bitarello and Mathieson, 2020); we find suggestive evidence  
144 consistent with this trend when partitioning the Mixed group into two bins along PC1 ( $R^2 = 0.091$ , 95% CI =  
145 [-0.04, 0.17],  $p = 6.4e-4$  in lower half of PC1 with more African ancestry vs  $R^2 = 0.12$ , 95% CI = [-9.0e-4, 0.21],  
146  $p = 5.7e-5$  with more out-of-Africa ancestry), although small sample sizes limit definitive comparisons ( $N = 137$   
147 in each PC1 bin). Our results are consistent with variable prediction accuracy among diverse African ancestry  
148 groups within South Africa and insignificant prediction in African populations for all but the most heritable and  
149 accurately predicted traits elsewhere.

## 150 Variable phenotypic and genetic similarities across the Uganda General Population 151 Cohort (GPC) and UK Biobank

### 152 Lower phenotypic correlations in Uganda GPC suggest higher contributing environmental effects

153 We next investigated phenotypic similarities within and across the Uganda GPC and UK Biobank participants  
154 because these are two of the largest cohorts with dozens of traits measured in African ancestry individuals. We  
155 first considered overall cohort differences between these cohorts--the Uganda GPC enrolled participants using  
156 a house-to-house study design and generated genetic data on 5,000 adults from rural villages in southwestern  
157 Uganda (Asiki et al., 2013), while the UK Biobank enrolled 500,000 people aged between 40-69 years in  
158 2006-2010 from across the country (**Methods** (Bycroft et al., 2018)). Previous studies have reported higher  
159 rates of infectious diseases (e.g. HIV, hepatitis B and C) in the Uganda GPC than would be expected in the UK  
160 Biobank (Asiki et al., 2013). There are many additional potential environmental explanations for mean shifts in  
161 phenotypes, such as dietary, food security, and age differences contributing to considerable BMI differences  
162 across cohorts ( $\mu = 21.3$  and  $\sigma = 3.8$  in Uganda GPC versus  $\mu = 27.4$  and  $\sigma = 4.8$  in UK Biobank,  $p < 2.2e-16$ ).  
163 To quantify comparisons while controlling for demographic differences for each of the 34 quantitative traits  
164 measured in both cohorts, we first mean centered each phenotype and regressed out the effects of age and  
165 sex within each cohort. Next, we then compared the distributions and variances of each phenotype across



166 cohorts via Kolmogorov-Smirnov and F-tests, respectively (**Table S4**). Given the large sample sizes, all K-S  
167 tests were significantly different, with several phenotypes showing distributional and variance differences of  
168 considerable magnitude (**Figure S7** and **Table S4**, e.g. Bilirubin, BASO, HbA1c, ALP, EOS, TG, and NEU).  
169

170 We next analyzed how similar the relationships are between phenotypes across datasets. Similar trends  
171 emerge overall, with distances across variance-covariance matrices for these cohorts showing evidence of  
172 significant correlation (Mantel test Z-statistic = 0.73,  $p < 1e-4$ ). The correlations among phenotypes are slightly  
173 higher overall in the Uganda GPC than in UK Biobank, both among related and unrelated individuals, as  
174 expected from a household versus volunteer-based design (**Figure 3B**, **Figure S8**). More specifically, we see  
175 consistent correlations among combinations of phenotypes including SBP and DBP; RBC, Hb, and HCT;  
176 Cholesterol and LDL; WC, BMI, WT, and HC; MCHC, MCH, and MCV; GGT, ALT, AST, and ALP; and MONO,  
177 NEU, and WBC with high overall correlations across these datasets for these traits (**Figure 3A-B**, see  
178 abbreviations in **Table S1**). Some pairs of traits, however, have significantly different correlations across  
179 datasets. The largest difference in phenotypic correlations across datasets is between ALP and WT ( $\rho = 0.11$ ,  
180  $p < 2.2e-16$  in UK Biobank versus  $\rho = -0.36$ ,  $p < 2.2e-16$  in Uganda GPC).  
181

182 Our next goal was to compare trait heritability estimates in the UK Biobank versus Uganda GPC data  
183 (**Methods**). However, the sample size and study design differences between these cohorts required the  
184 application of different methods that limit comparability. Specifically, the household design of Uganda GPC  
185 included smaller sample sizes with more relatives in which family-based heritability estimates are most  
186 appropriate, whereas the large sample size and volunteer design in UK Biobank makes SNP-based heritability  
187 estimates from unrelated individuals most appropriate. **Figure S9** compares heritability estimates across traits  
188 in the UK Biobank versus Uganda GPC using these approaches (Gurdasani et al., 2019). As expected from  
189 the differences in the methods, study designs, and sample sizes, we find higher but noisier estimates in  
190 Uganda GPC for most traits, consistent with expectation from family-based versus unrelated heritability  
191 estimates across these two studies.

192 African genetic risk predictions from European ancestry GWAS data are remarkably inaccurate  
193 To understand baseline trans-ethnic PRS accuracy using a typical approach, we predicted 32 traits in the  
194 Uganda GPC using GWAS summary statistics from the UK Biobank European ancestry individuals. While  
195 several traits were significantly predicted across ancestries, prediction accuracy was low for most traits (**Figure**  
196 **S10**); the most accurate PRS was for MPV, ( $R^2 = 0.036$ , 95% CI = [0.0069, 0.063],  $p = 5.73e-7$ ) while the  
197 average variance explained across all traits was less than 1% (mean  $R^2 = 0.007$ ). To assess the relative effects  
198 of ancestry versus cohort differences on decreases in prediction accuracy across populations, we next  
199 withheld 10,000 European ancestry individuals from UK Biobank for use as a target cohort, reran all GWAS,  
200 then used individuals with diverse continental ancestries in the UK Biobank as target populations (EUR =  
201 Europeans withheld from the GWAS, AMR = admixed American, MID = Middle Eastern, CSA = Central/South  
202 Asian, EAS = East Asian, and AFR = African, **Figure S11**), subcontinental African ancestries in the UK  
203 Biobank (Ethiopian, Admixed, South, East, West African ancestries, **Figure S12**), as well as the Uganda GPC  
204 (**Figure 4A**, **Table S4**).  
205

206 Among continental ancestries, we computed  $R^2$  and 95% confidence intervals for each trait (**Figure S13**), then  
207 computed median relative accuracy (RA) compared to Europeans and median absolute deviation (MAD)  
208 across all traits. We predict these traits most accurately in EUR (RA = 1, MAD = 0), followed by AMR (RA =  
209 0.784, MAD = 0.023), MID (RA = 0.643, MAD = 0.034), CSA (RA = 0.621, MAD = 0.031), EAS (RA = 0.477,

210 MAD = 0.024), and AFR (RA = 0.219, MAD = 0.014) (**Figure 4A**). We next compared prediction accuracy  
211 within African ancestry populations. Because some PRS accuracy estimates were noisy due to small sample  
212 sizes in UK Biobank Africans (especially Ethiopian and South African ancestry individuals, **Table S4**), we  
213 restricted analyses to those traits predicted with a 95% confidence interval < 0.08. Among these traits, we  
214 predicted most accurately those with Ethiopian ancestry (RA = 0.511, MAD = 0.059), followed by recently  
215 admixed individuals with West African and European ancestry (RA = 0.276, MAD = 0.016), East African  
216 ancestry (RA = 0.193, MAD = 0.023), West African ancestry (RA = 0.150, MAD = 0.012), and South African  
217 ancestry (RA = 0.083, MAD = 0.014) (**Figure 4A**). These results track with genetic distance and population  
218 history; the highest prediction accuracy identified in Ethiopians is expected given closer genetic proximity to  
219 European populations relative to other Africans due to back-to-Africa migrations influencing population  
220 structure there (Henn et al., 2012b; Hodgson et al., 2014; Pagani et al., 2015). The lowest prediction accuracy  
221 is in populations with southern African ancestry, consistent also with higher genetic divergence from European  
222 populations and more genetic diversity overall (Busby et al., 2016; Choudhury et al., 2020; Henn et al., 2011).

### 223 Lower prediction accuracy across ancestries than across cohorts

224 To compare prediction accuracy among similar ancestry participants from different cohorts, we next computed  
225 PRS for 32 traits using GWAS summary statistics from UK Biobank Europeans in two target populations: UK  
226 Biobank participants with East African ancestry versus Uganda GPC. As expected, prediction accuracy in  
227 these populations is very low across all traits in both cohorts and only slightly higher in the UK East African  
228 ancestry individuals than in the Uganda GPC individuals (mean  $R^2$  = 0.017, sd = 0.013 versus mean  $R^2$  =  
229 0.012, sd = 0.010, respectively, **Figure S14**). Across traits, the differences in PRS accuracy across cohorts but  
230 within the same ancestry are much smaller than the differences across ancestries but within the UK Biobank,  
231 indicating that ancestry has a larger impact on genetic risk prediction than cross-cohort differences analyzed  
232 here. Smaller effects on genetic prediction accuracy differences across cohorts may be attributable to  
233 environmental differences, such as higher rates of malnutrition and infectious diseases previously reported in  
234 Uganda and in the GPC (Asiki et al., 2013; Nalwanga et al., 2020).

### 235 Improved African genetic risk prediction accuracy with multi-ethnic GWAS summary statistics

236 We next maintained the target populations but varied the discovery cohort to determine how more diverse  
237 GWAS impacts PRS accuracy for these phenotypes in diverse populations. Specifically, we computed PRS  
238 accuracy in diverse target populations in the UK Biobank (**Table S5**) using one of two discovery cohorts: the  
239 UKB European-only cohort versus diverse discovery cohorts combined via meta-analysis (**Table S6**).  
240 Meta-analyzed GWAS summary statistics come from several cohorts, including the UK Biobank (UKB),  
241 Biobank Japan (BBJ) (Nagai et al., 2017), Population Architecture Using Genomics and Epidemiology (PAGE)  
242 Consortium (Wojcik et al., 2019), and Uganda Genome Resource (UGR) (Gurdasani et al., 2019). For each  
243 trait, discovery cohort, and target cohort combination, we normalized the PRS  $R^2$  values from the p-value  
244 threshold that explained the maximum phenotypic variance with respect to the prediction accuracy in the  
245 European target cohort using UK Biobank summary statistics only, then computed relative accuracies as  
246 before.

247  
248 We find that prediction accuracy improves the most across populations when using a discovery cohort  
249 consisting of GWAS summary statistics meta-analyzed across the UKB, BBJ, and PAGE cohorts (**Figure 4B**),  
250 but not the UGR data (**Figure S15**). Instead, meta-analyzing the UGR data with UKB did not improve  
251 prediction accuracy for any population and most notably decreased accuracy in African ancestry target  
252 populations (discovery UKB median RA = 0.22, UGR+UKB median RA = 0.15, **Figure S16**). We hypothesize

253 that this can be explained by the relatively small sample size of UGR adding more noise than signal compared  
254 to the other relatively large discovery datasets, but another explanation could come from environmental  
255 heterogeneity. When predicting traits using the UKB, BBJ, and PAGE meta-analysis as a discovery cohort, we  
256 find that prediction accuracy increases most for the AMR, EAS, and AFR target populations, which more  
257 closely resemble the ancestry patterns of PAGE and BBJ (**Figure 4B**). These findings are consistent with  
258 ancestry-matched discovery data disproportionately improving prediction accuracy in the corresponding target  
259 population (Bigdeli et al., 2019; Lam et al., 2019; Martin et al., 2019).

260 Large-effect population-enriched genetic variants drive heterogeneity in polygenic score accuracy for  
261 blood panel traits

262 We find that PRS accuracy improvements from higher diversity in the discovery cohorts vary across traits, with  
263 the largest increases seen in MCHC and WBC. We searched for specific genetic loci that could explain this  
264 pattern by comparing the significance of genetic associations in UKB alone versus the meta-analysis of UKB,  
265 BBJ, and PAGE (**Table S6**). For MCHC and WBC in particular, the genetic variants contributing to these  
266 improved PRS consist of several well-known population-enriched variants (**Figure 4C** and **4D**). For example,  
267 genetic variants that disproportionately explain population-specific risk for MCHC include variants previously  
268 associated with hemoglobin concentration, including rs9399137 upstream of *HBS1L* and *MYB* in a study of  
269 sickle cell anemia ( $p = 5.24e-249$  and  $\beta = 0.0783$  in the meta-analysis) (Lettre et al., 2008), rs855791 in  
270 *TMPRSS6* ( $p = 3.49e-241$ ,  $\beta = 0.0692$ ) (Benyamin et al., 2009; Chambers et al., 2009), and rs551118  
271 upstream of *PIEZO1* and *CDT1* ( $p = 5.18e-100$ ,  $\beta = -0.0451$ ) (Astle et al., 2016) (**Table S7**). Associations with  
272 WBC tend to show more population-enriched associations as shown in the meta-analysis (**Figure 4D**),  
273 including rs3936197 in *MED24* ( $p = 5.18e-289$ ,  $\beta = -0.0772$ ), rs58650325 near the high affinity IgE receptor  
274 *FCER1A* that initiates the allergic response ( $1.57e-163$ ,  $\beta = -0.097$ , also close to *OR10J3*), and rs11533993 in  
275 *CDK6* ( $p = 1.55e-84$ ,  $\beta = -0.0799$ ). Thus, genetic architecture and population genetic considerations are  
276 important to bear in mind when considering the generalizability of polygenic scores.

## 277 Discussion

278 PRS have been proposed as genetic biomarkers for use in preventative medicine (Khera et al., 2018; Knowles  
279 and Ashley, 2018), but are currently limited by low accuracy across populations especially in African ancestry  
280 populations (Martin et al., 2019; Sirugo et al., 2019). This study has enabled unique insights into PRS  
281 transferability within and among diverse continental African populations as well as among African ancestry  
282 populations living in considerably different environments. We demonstrate looming challenges for applying  
283 current PRS in African ancestry populations; because relatively few genetic studies have been conducted in  
284 African populations coupled with their uniquely deep population histories, PRS accuracy is low but widely  
285 variable. Differences in PRS accuracy across diverse African ancestries from different regions can be larger  
286 than across out-of-Africa continents. This is particularly problematic as widely-used algorithms that guide  
287 health decisions already have ingrained racial biases (Obermeyer et al., 2019), warning of compounding  
288 challenges with implementation. We demonstrate that there are clear steps the field can take to work against  
289 these biases. Specifically, including ancestrally diverse populations in GWAS discovery cohorts improves  
290 accuracy for all populations and especially underrepresented populations more than conducting similarly sized  
291 studies with only European ancestry cohorts.

292  
293 Another advantage of using GWAS from globally diverse populations to compute PRS is the routine inclusion  
294 of population-enriched variants. Clear examples such as African-enriched variants in *APOL1* and *G6PD* have

295 been shown to contribute especially high risk of chronic kidney disease and to missed diabetes diagnosis,  
296 respectively (E et al., 2018; Rotimi et al., 2017). These examples highlight the importance of studying diverse  
297 populations to predict genetic risk of disease equitably by aggregating variants across the spectrum of allele  
298 frequencies and effect sizes in different populations. Relevant to the traits studied in genetic analyses here,  
299 hematological differences such as anemia are more common in lower income countries in Africa and in African  
300 ancestry populations elsewhere compared to European ancestry populations in high income countries,  
301 particularly among older individuals. These hematological differences potentially arise in part due to genetic  
302 variation as well as the higher prevalence of infectious diseases and pathogens, poorer nutritional status, and  
303 altitude (Mugisha et al., 2013, 2016). Here, we show that variants influencing risk of beta thalassemia  
304 disproportionately increase PRS accuracy for hemoglobin variation particularly in African ancestry populations.  
305 The inclusion of population-enriched variants in PRS could eliminate genetic justifications for race-based  
306 medicine, which problematically reinforces implicit racial biases by overemphasizing the link between genetics  
307 and race despite the fact that there is more genetic variation within than between populations (Cerdeña et al.,  
308 2020).

309  
310 In addition to reduced PRS accuracy with ancestral distance from GWAS cohorts, genetic nurture, social  
311 genetic, and environmental effects can also contribute to low portability of PRS across populations (He et al.,  
312 2019; Mostafavi et al., 2020), with some interventions modulating health along PRS strata (Barcellos et al.,  
313 2018). In this study, however, ancestry appears to have a larger effect on portability than cohort differences  
314 overall. An important distinction when comparing the magnitude of these and other non-genetic effects in other  
315 studies is that the traits most accurately genetically predicted here were primarily anthropometric and blood  
316 panel traits. When analyzing traits with more sociodemographic influences in increasingly diverse populations,  
317 population stratification, confounding, and study design considerations are thornier issues (Kerminen et al.,  
318 2019; Novembre and Barton, 2018; Zaidi and Mathieson, 2020). PRS accuracy comparisons across  
319 ancestrally similar but environmentally diverse populations are especially important for medically actionable  
320 traits. For example, particularly low PRS portability for triglycerides (TG) from European to the Uganda GPC  
321 resulted at least in part from effect size heterogeneity that has previously been connected to pleiotropic and  
322 gene \* environment effects; specifically, most non-transferable genome-wide significant associations with TG  
323 showed pleiotropic associations with BMI in Europeans but not Ugandans (Kuchenbaecker et al., 2019).

324  
325 While PRS currently have limited portability, increased diversity in genetic studies is already decreasing  
326 prediction accuracy gaps across populations (Bigdeli et al., 2019; Kuchenbaecker et al., 2019). This is  
327 consistent with causal genetic effects tending to be similar across populations but with LD and allele frequency  
328 differences modifying marginal effect size estimates (Martin et al., 2019). This is also consistent with  
329 trans-ethnic genetic correlations tending to be close to or not significantly different from 1 (Brown et al., 2016;  
330 Shi et al., 2020). The most rapid path to closing gaps in PRS transferability is to increase the inclusion of  
331 GWAS participants from populations most divergent from those already routinely studied. As empirically  
332 demonstrated here, when comparing PRS accuracy calculated from diverse cohort meta-analysis versus data  
333 from Europeans only, large-scale GWAS with diverse African populations will most rapidly reduce portability  
334 gaps across global populations because they have the most genetic diversity, most rapid linkage disequilibrium  
335 decay, and highest genetic divergence from the best studied populations. Major efforts underway such as the  
336 Human Hereditary and Health in Africa Initiative, PAGE, All of Us, and NeuroGAP programs (All of Us  
337 Research Program Investigators et al., 2019; Hindorff et al., 2018; Mulder et al., 2018; Stevenson et al., 2019;  
338 Wojcik et al., 2019) are especially promising for rectifying current PRS gaps and missed scientific opportunities  
339 by increasing inclusion of diverse African participants.

340



341 Beyond expanding on diversity by increasing the number of study participants in large-scale studies, it is  
342 equally important to diversify researchers working on genomics studies. Currently, the vast majority of  
343 researchers in genomics studies are of European ancestry (Ginther et al., 2011; Hamrick, 2019; Hoppe et al.,  
344 2019), paralleling the over-representation of European-ancestry individuals in genomic studies. The exclusion  
345 of African researchers leads to the disparity in research leadership and reduced scientific output from African  
346 researchers (Bentley et al., 2020). Efforts such as the NeuroGAP Global Initiative for Neuropsychiatric  
347 Genetics Education and Research (GINGER) program (van der Merwe et al., 2018), which provides  
348 mentorship and training for early-career investigators on the African continent (particularly in Uganda, Kenya,  
349 Ethiopia and South Africa, including several of this study's authors), are important in moving toward a more  
350 inclusive and representative research community.

## 351 Conclusion

352  
353 Previous studies that have examined PRS accuracy across globally diverse ancestry groups have  
354 demonstrated that accuracy is lowest in African ancestry samples. However, the extent to which this accuracy  
355 varies within African-ancestry populations has not been previously investigated. Our findings that prediction  
356 accuracy varies by African-ancestry populations is a clear reflection of the vast genetic diversity of the  
357 continent. It is therefore critically important to create well-powered GWAS that reflect the full range of diversity  
358 within Africa.

359

360

## 361 Materials and Methods

### 362 Genetic and Phenotypic Data

363 Total counts of individuals by population and/or study are shown in **Table S2**.

#### 364 1000 Genomes Project

365 1000 Genomes Project data from the phase 3 integrated call set was accessed and used as a reference panel  
366 and for phasing and imputation. (1000 Genomes Project Consortium et al., 2015)

#### 367 Human Genome Diversity Project (HGDP)

368 Genotype data for samples from HGDP was publicly available on the Illumina HumanHap650K GWAS array on  
369 hg18 (Li et al., 2008). We lifted over the genotype data to the hg19 genome build using hail (<http://hail.is>).

#### 370 African Genome Variation Project (AGVP)

371 As described previously (Gurdasani et al., 2015), the AGVP data consists of dense genotype data from 1,481  
372 individuals from 18 ethno-linguistic groups from Eastern, Western, and Southern Africa when including the  
373 Luhya and Yoruba from the 1000 Genomes Project (1000 Genomes Project Consortium et al., 2015). When  
374 accessed from the European Genome-Phenome Archive (EGA), "Ethiopian" is the provided population label  
375 encompassing the Oromo, Amhara, and Somali groups. After collapsing these groups and counting the 1000  
376 Genomes data separately, 1,307 individuals from 14 populations are uniquely represented in AGVP, and 2,504

377 individuals from 26 populations are represented in the 1000 Genomes Project data (661 individuals from 7  
378 populations are in the AFR super population grouping).

### 379 Drakenstein Children's Health Study (DCHS) in South Africa

380 The DCHS is an ongoing, multidisciplinary population-based birth cohort study in the Drakenstein area in Paarl  
381 (outside Cape Town, South Africa) (Stein et al., 2015; Zar et al., 2015, 2019). After providing informed consent,  
382 pregnant women were enrolled during their second trimester (20–28 weeks gestation); maternal-child dyads  
383 were then followed through childbirth and longitudinally thereafter. Enrollment occurred from March 2012 to  
384 March 2015 at two primary health care clinics - TC Newman (serving a predominantly mixed ancestry  
385 population) and Mbekweni (serving a predominantly Black African population). Women were eligible to  
386 participate in the DCHS if they attended one of the study clinics, were at least 18 years of age and intended to  
387 remain residing in the study area.

### 388 Uganda General Population Cohort (GPC)

389 The rural Uganda GPC of MRC/UVRI & LSHTM Uganda Research Unit was set up in 1989 initially to monitor  
390 the HIV epidemic among adults, children, and adolescents, but its mandate has since expanded to include  
391 other medical conditions (Asiki et al., 2013). The 'original GPC' is located in the sub-county of Kyamulibwa in  
392 rural south-western Uganda with activities having recently been expanded to the neighbouring two peri-urban  
393 townships of Lwabenge and Lukaya. The 'original GPC' includes about 10,000 adults and about 10,000  
394 children and adolescents. In 2011, genotype data was generated on more than 5,000 adult participants from  
395 nine ethnolinguistic groups using the Illumina HumanOmni2.5 BeadChip at the Sanger Wellcome Trust Institute  
396 (Asiki et al., 2013; Heckerman et al., 2016).

### 397 UK Biobank (UKB)

398 The UK Biobank enrolled 500,000 people aged between 40-69 years in 2006-2010 from across the country, as  
399 described previously (Bycroft et al., 2018). A more detailed description of the cohort is available on their  
400 website: <https://www.ukbiobank.ac.uk/>. We analyzed phenotypes that overlapped with those studied in the  
401 Uganda GPC.

### 402 Ancestry analysis in the UK Biobank

403 As described previously (Bycroft et al., 2018), the UK Biobank consists of approximately 500,000 participants  
404 of primarily European ancestry who have thousands of measured or reported phenotypes. To assess polygenic  
405 score accuracy across diverse ancestries, we identified populations of ancestral groups at two levels: 1)  
406 among continental groups, and 2) among regions in Africa. To define continental ancestries, we first combined  
407 reference data from the 1000 Genomes Project and HGDP. We combined these reference datasets into  
408 continental ancestries according to their corresponding meta-data (**Table S5**). We then ran PCA on unrelated  
409 individuals from the reference dataset. To partition individuals in the UK Biobank based on their continental  
410 ancestry, we used the PC loadings from the reference dataset to project UK Biobank individuals into the same  
411 PC space. We trained a random forest classifier given continental ancestry meta-data (AFR = African, AMR =  
412 admixed American, CSA = Central/South Asian, EAS = East Asian, EUR = European, and MID = Middle  
413 Eastern) based on the top 6 PCs from the reference training data. We applied this random forest to the  
414 projected UK Biobank PCA data and assigned initial ancestries if the random forest probability was >50%  
415 (similar results obtained for  $p > 0.9$ ), otherwise individuals were dropped from further analysis.

416

417 We next further partitioned African ancestry individuals using the same random forest approach as above but  
418 without further probability thresholding using African ancestry reference data from AGVP, HGDP, and the 1000  
419 Genomes Project. We partitioned these reference data into UN regional codes with an additional region for  
420 Ethiopian populations given their unique population history and collapsing in African Genome Variation Project  
421 data (Admixed, Central, East, Ethiopia, South, and West Africa), as shown in **Table S5**. PCA with reference  
422 data at the continental and subcontinental level within Africa are shown in **Figures S10-11**.

## 423 Phasing and imputation

424 We used the Ricopili pipeline to conduct pre-imputation QC and perform phasing and imputation for AGVP and  
425 the Uganda GPC (Lam et al., 2020). This pipeline was also used on the DCHS data, as described previously  
426 (Duncan et al., 2018). Briefly, we phased the data using Eagle 2.3.5 and imputed variants using minimac3 in  
427 chunks  $\geq 3$  Mb. The 1000 Genomes phase 3 haplotypes were used as the reference panel for phasing and  
428 imputation. For the AGVP, we used strict best guess genotypes where a variant was called if it had a  
429 probability of  $p > 0.8$  and a missing rate less than 0.01 and MAF  $> 5\%$ . Then, variants with MAF  $< 0.001$  were  
430 excluded from the dataset. For Uganda GPC, we used combined best guess genotypes where a variant was  
431 called if it had a probability  $p > 0.8$  or set to missing otherwise. Then, SNPs were filtered to keep sites with  
432 missingness  $< 0.01$  and MAF  $> 0.05$ . We used genotype dosages when computed PRS.

## 433 PCA

434 Only SNPs with high imputation quality (INFO $>0.8$ ) were considered for principal component analysis. We  
435 computed the first 20 principal components using plink with the `--pca` flag for autosomal SNPs MAF  $> 0.05$  and  
436 individual missingness  $< 0.05$ .

## 437 Simulation setup

438  
439 To test the PRS prediction accuracy within and across African populations, we simulated four quantitative traits  
440 while varying heritabilities ( $h^2 = 0.1, 0.2, 0.4$  and  $0.8$ ) as follows:

441  
442 We randomly assigned an effect size to 5, 20, 100, 2,000, 10,000 and 50,000 causal variants, respectively.  
443 The causal effect was calculated based on the relationship between effect size and minor allele frequency as  
444 shown by (Schoech et al., 2019). We then calculated an individual's 'true' polygenic risk as the sum of all  
445 causal effects using the `--score` flag in PLINK v1.07B (Chang et al., 2015). True polygenic scores were  
446 standardized to a mean of zero and standard deviation of 1. To account for the contribution of environmental  
447 risk factors, we assigned environmental effects from a normal random distribution (mean = 0 and sd = 1). The  
448 phenotype was generated according to its heritability as the weighted sum of the true polygenic risk and a  
449 random environmental effect as below:

$$450 \text{phenotype} = \text{true polygenic risk} + (1 - h^2) \times \text{environmental effect}$$

451  
452  
453 We then conducted GWAS for the simulated phenotype by splitting the AGVP dataset into three groups  
454 broadly representing the three geographical areas where samples were obtained from: East ( $n = 589$ ), West ( $n$   
455  $= 517$ ) and South Africa ( $n = 186$ , **Figure 2A**). To allow for the quantification of PRS prediction accuracy across  
456 the geographical regions, each group was further split into discovery and target cohorts. The size of the target  
457 cohorts was maintained at  $n = 186$  across all groups, while the discovery cohort consisted of all remaining

458 individuals (East  $n = 403$ , West  $n = 331$ , and no South Africans). We conducted a linear regression for all the  
459 simulated traits for the East and West discovery datasets, controlling for the first 20 principal components.  
460

461 In PLINK v1.07, independent SNP sets were obtained for each discovery cohort by clumping SNPs from  
462 corresponding summary statistics files with an  $R^2$  value greater than 0.1 using in-sample LD and within 500 kb  
463 of each other. The effect sizes from the SNP set was used as weights to compute PRS for all three of our  
464 target datasets for a range of  $P$ -values (5e-08, 1e-06, 1e-04, 1e-03, 1e-02, 0.05, 0.1, 0.2, 0.5 and all). PRS  
465 was calculated as the sum of all SNPs multiplied by their effect sizes. We calculated PRS for each of the target  
466 datasets using the summary statistics from the discovery dataset GWAS (**Figure 2B**).  
467

## 468 Heritability estimation

469 For the Ugandan GPC, we relied on heritability estimates of 34 quantitative traits computed previously  
470 (Gurdasani et al., 2019). For UK Biobank, we computed heritability estimates for the same traits using LD  
471 score regression with the default model (i.e. without any functional annotations) (Bulik-Sullivan et al., 2015)  
472 and using used population-matched LD score references from European populations downloaded from the  
473 authors' website (<https://data.broadinstitute.org/alkesgroup/LDSCORE/>).

## 474 Polygenic score calculation

475 All PRS were calculated using a pruning and thresholding approach implemented either in plink2 or in hail  
476 using custom scripts. All clumping was done in plink2 using an LD threshold of  $r^2 = 0.1$  and a window size of  
477 500 kb with discovery cohort population-specific reference panels. We calculated PRS using plink2 with the  
478 `--score` and `--q-score-range` flags for AGVP simulations and DCHS. We wrote custom scripts in hail  
479 (<http://hail.is>) to calculate PRS in the Uganda GPC and UK Biobank data due to the larger sample sizes (see  
480 **Web resources**). For imputed genotypes, we used SNP dosages in PRS calculations. We computed 10 PRS  
481 for each analysis using the following p-value thresholds: 1, 0.5, 0.2, 0.1, 0.05, 0.01, 1e-3, 1e-4, 1e-6, 5e-8. The  
482 PRS that explained the most phenotypic variance is shown in most figures.  
483

484 We calculated PRS accuracy for continuous traits computed with custom scripts in R (**Web resources**). For  
485 AGVP simulations and DCHS (because all participants were mothers of a similar age), we included the first 10  
486 PCs as covariates when computing the partial  $R^2$  specifically attributable to the PRS. For Uganda GPC data,  
487 we included age, sex, and the first 10 PCs when computing partial  $R^2$  of the PRS. For consistency with the  
488 GWAS that were run in UK Biobank previously (Howrigan, 2017) and here with a holdout target set, we  
489 included, age, sex, age<sup>2</sup>, age\*sex, age<sup>2</sup>\*sex, and the first 10 PCs as covariates when computing the PRS  
490 partial  $R^2$ . (The UKB European GWAS included 20 PCs, but fewer were used here due to the particularly small  
491 sample sizes of some other target ancestry groups, **Table S5**, coupled with minimal population structure  
492 observed in PCs lower than PC10).

## 493 Meta-analysis

494 We used plink2 to conduct inverse variance-weighted meta-analysis across GWAS summary statistics with the  
495 `--meta-analysis` option.



## 496 LD reference panels and clumping

497 All PRS calculations required an LD panel for clumping. Our analyses used in-sample LD where feasible and  
498 reference panel data as a proxy with ancestry matching from the 1000 Genomes Project phase 3 data when  
499 individual-level data was unavailable. We weighted the ancestral representation of each population per trait  
500 matching at the continental level. We matched individuals as follows:

501

| Cohort | 1000 Genomes phase 3 reference data                                                                           |
|--------|---------------------------------------------------------------------------------------------------------------|
| BBJ    | East Asian (EAS)                                                                                              |
| UKB    | European (EUR)                                                                                                |
| UGR    | African (AFR)                                                                                                 |
| PAGE   | Proportional weighting of AFR, EAS, AMR (depending on trait, see <b>Table S6</b> description for more detail) |

502

503 We then used the maximal number of individuals available when weighting proportionally to construct this  
504 reference panel. For example, in the meta-analysis of height across the UKB, BBJ, and PAGE cohorts, UKB  
505 has the largest sample size in the discovery cohort (N = 350,353), so all Europeans from 1000 Genomes were  
506 included in the reference panel (N = 503), then a random sampling of EAS, AFR, and AMR individuals were  
507 included proportionally to the overall diversity of the discovery cohorts in the meta-analysis.

## 508 Acknowledgements

509 We thank Lori Chibnik, Bizu Gelaye, Kristi Post, and Courtney White for facilitating the GINGER program and  
510 making this work possible. This work was supported by funding from the National Institutes of Health  
511 (K99MH117229 to A.R.M.; K01MH121659 and T32MH017119 to E.G.A.). UK Biobank analyses were  
512 conducted via application 31063. The DCHS is funded by the Bill and Melinda Gates Foundation (OPP  
513 1017641). Additional support for HJZ and DJS, and for the research reported in this publication, was provided  
514 by the South African Medical Research Council (SAMRC). The SAMRC provided additional support through its  
515 Division of Research Capacity Development under the National Health Scholarship programme from funding  
516 received from the Public Health Enhancement Fund/South African National Department of Health. The views  
517 and opinions expressed are those of the authors and do not necessarily represent the official views of the  
518 SAMRC. We thank the mothers and their children for participating in the DCHS and the study staff, the clinical  
519 and administrative staff of the Western Cape Government Health Department at Paarl Hospital and at the  
520 clinics for support of the study. We also thank all research participants in the UK Biobank, BioBank Japan,  
521 PAGE study, UGR and Uganda GPC, and AGVP studies.

## 522 Data and Code Availability

523 All data used in this study are publicly available. Data from the African Genome Variation Project was  
524 accessed by combining EGAD00010001045, EGAD00010001046, EGAD00010001047, EGAD00010001048,  
525 EGAD00010001049, EGAD00010001050, EGAD00010001051, EGAD00010001052, EGAD00010001053,  
526 EGAD00010001054, EGAD00010001055, EGAD00010001056, EGAD00010001057, and

527 EGAD00010001058. The Drakenstein Child Health Study is committed to the principle of data sharing.  
 528 De-identified data will be made available to requesting researchers as appropriate. Requests for collaborations  
 529 to undertake data analysis are welcome. More information can be found on our website  
 530 (<http://www.paediatrics.uct.ac.za/scah/dclhs>). Uganda GPC genetic data used in this paper were accessed  
 531 through EGAD00010000965 and phenotype data was accessed via sftp from EGA (reference: DD\_PK\_050716  
 532 gwas\_phenotypes\_28Oct14.txt). We accessed data from the UK Biobank with application 31063. BioBank  
 533 Japan summary statistics were accessed from <http://jenger.riken.jp/en/result>. GWAS summary statistics for the  
 534 Population Architecture using Genomics and Epidemiology (PAGE) study were accessed through the  
 535 NHGRI-EBI GWAS Catalog (<https://www.ebi.ac.uk/gwas/downloads/summary-statistics>).  
 536  
 537 All code used in analysis is available here: [https://github.com/armartin/africa\\_prs](https://github.com/armartin/africa_prs).

## 538 Figures

539

540

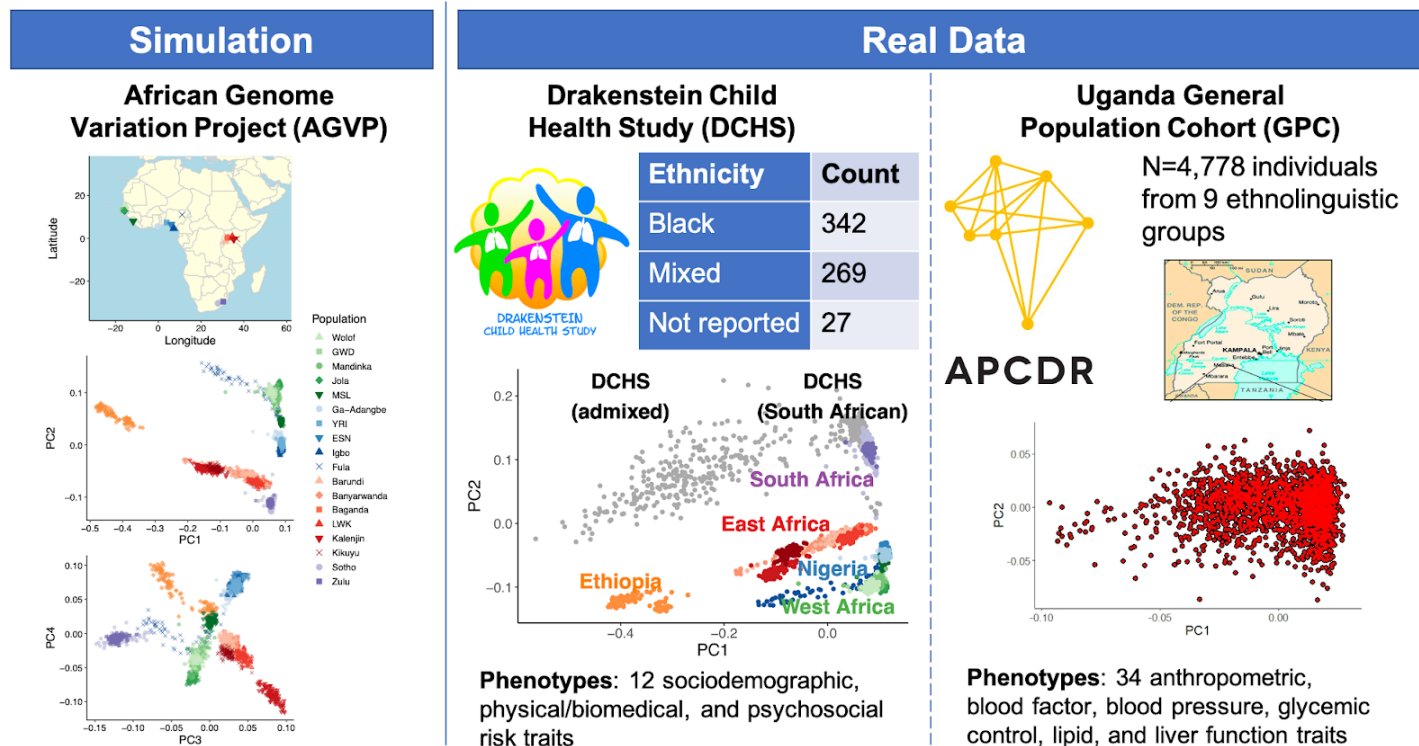

541 **Figure 1 - Project overview of genetic and phenotypic datasets used to assess polygenic score**  
 542 **generalizability within and across diverse African populations.** Using publicly available GWAS data from  
 543 primarily Eurocentric populations, we measure how polygenic scores perform in Africa. In simulations, we use  
 544 AGVP genetic data and simulated phenotypes to assess polygenic score generalizability within Africa. In real  
 545 data, we use two datasets to measure polygenic score accuracy: the South African DCHS cohort data and the  
 546 Ugandan GPC cohort data.

547

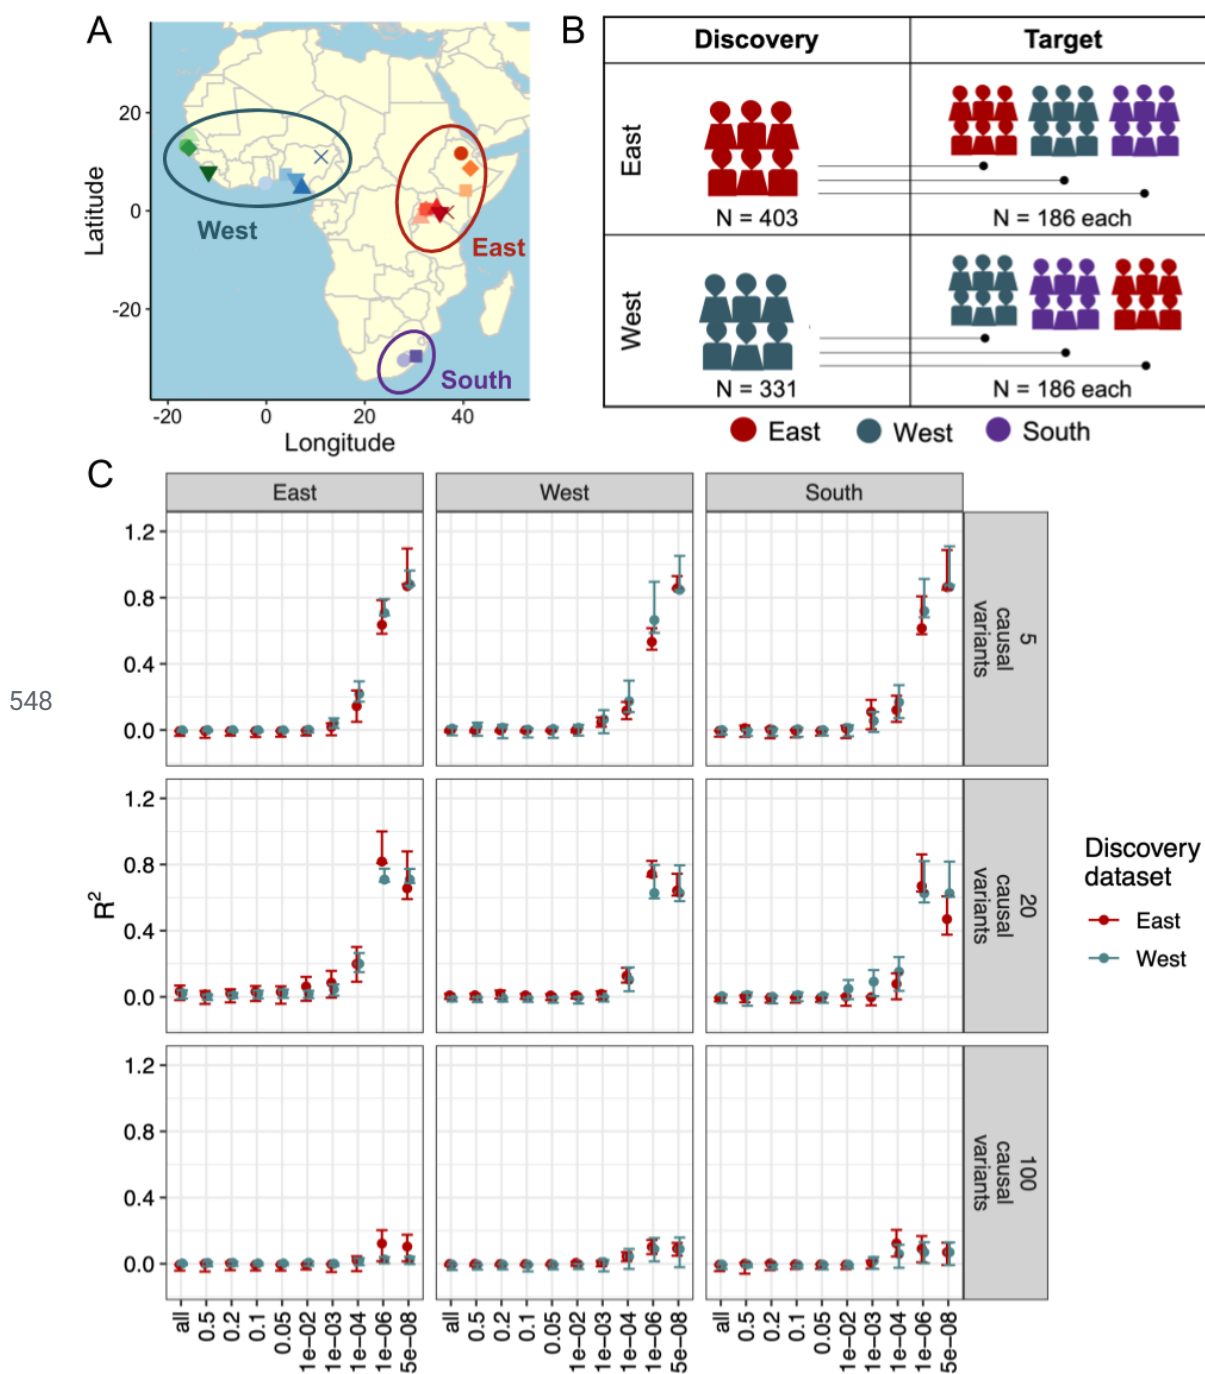

550 **Figure 2 - Simulated GWAS and polygenic scores indicate differential prediction accuracy across**  
 551 **diverse regions of Africa using genetic data from the AGVP.** A) Populations were grouped into East, West,  
 552 and South based on the United Nations geoscheme groupings. B) GWAS discovery cohorts included East (N =  
 553 403) and West (N=331) African individuals, which were independent of each target cohort (N = 186 individuals  
 554 per region). South Africans were excluded from the discovery population due to the limited total sample size (2  
 555 populations and 186 individuals total). C) Predictive accuracy of the simulated quantitative trait at the  
 556 heritability of 0.8. The predictive accuracy was calculated for six categories of causal variants for the West and  
 557 East discovery cohorts, across ten  $p$ -value thresholds.

558

559

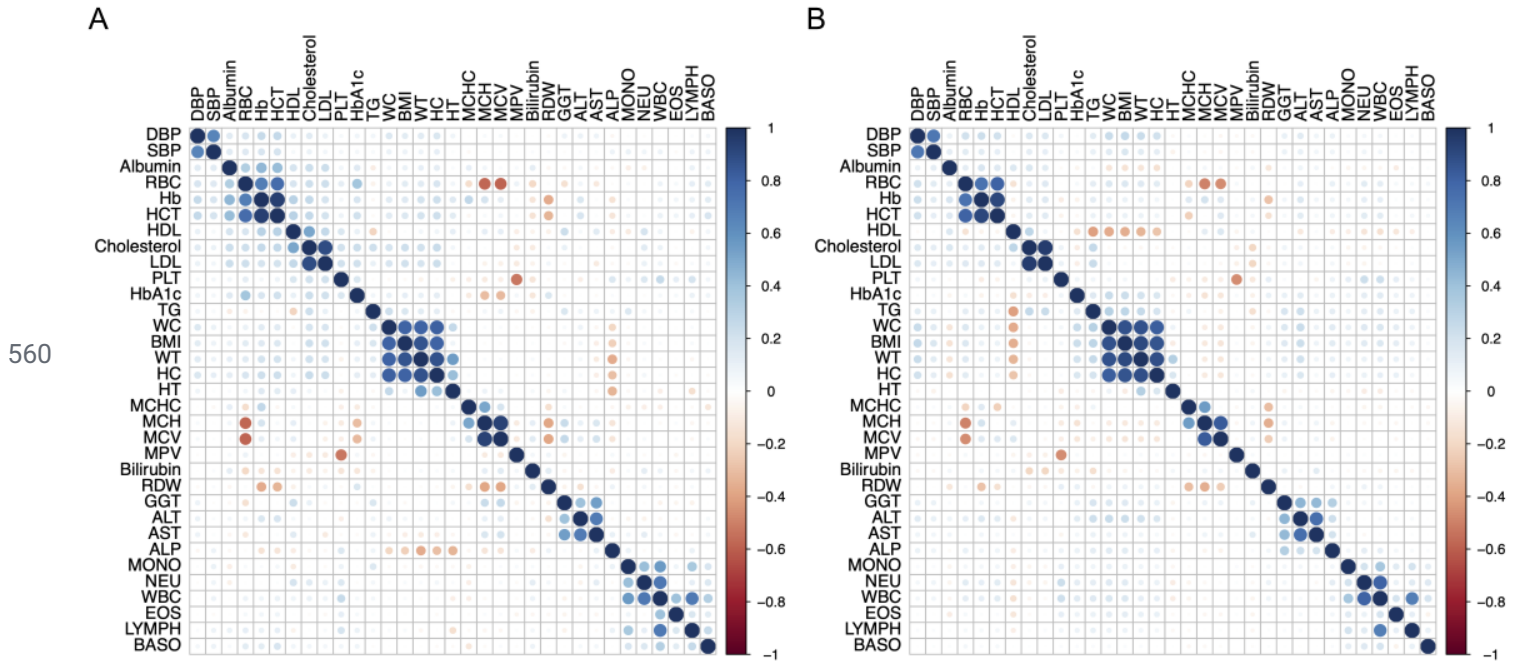



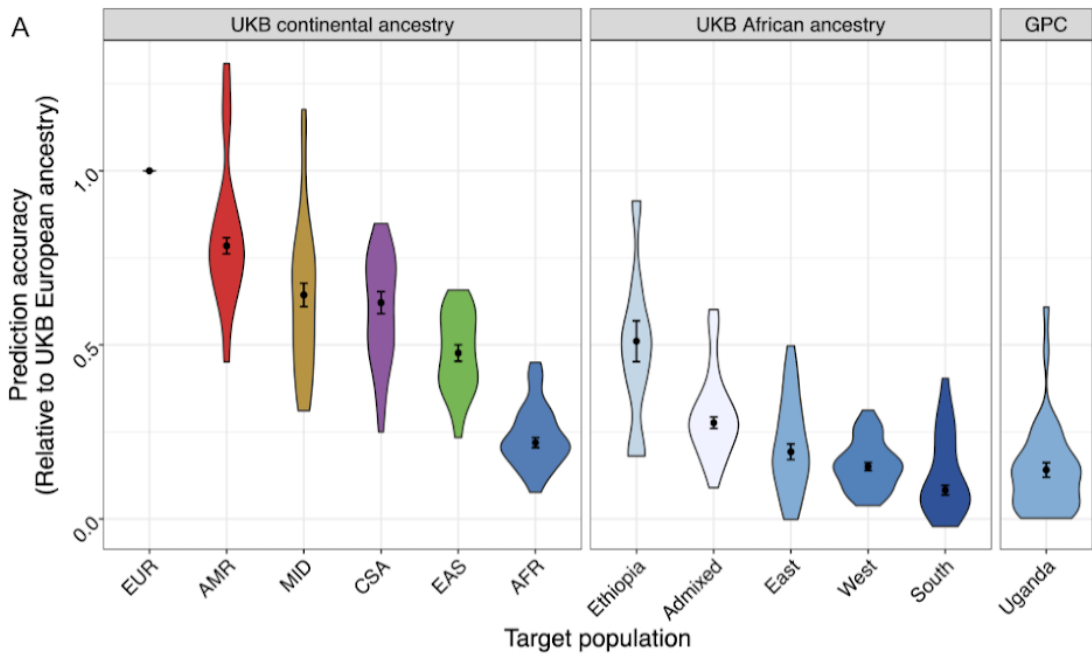

567

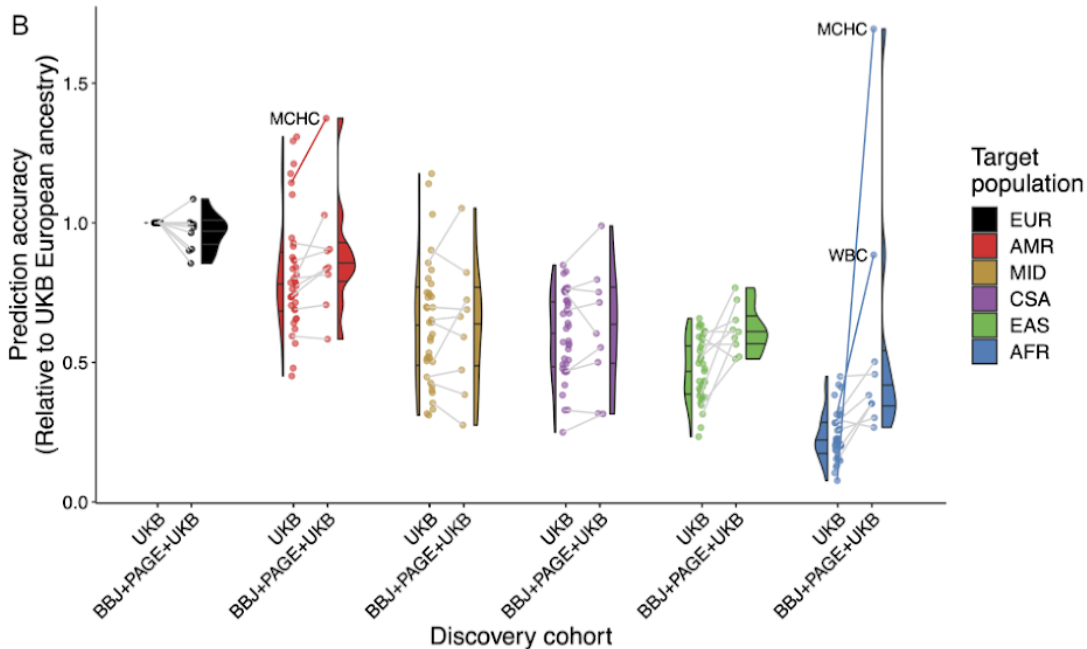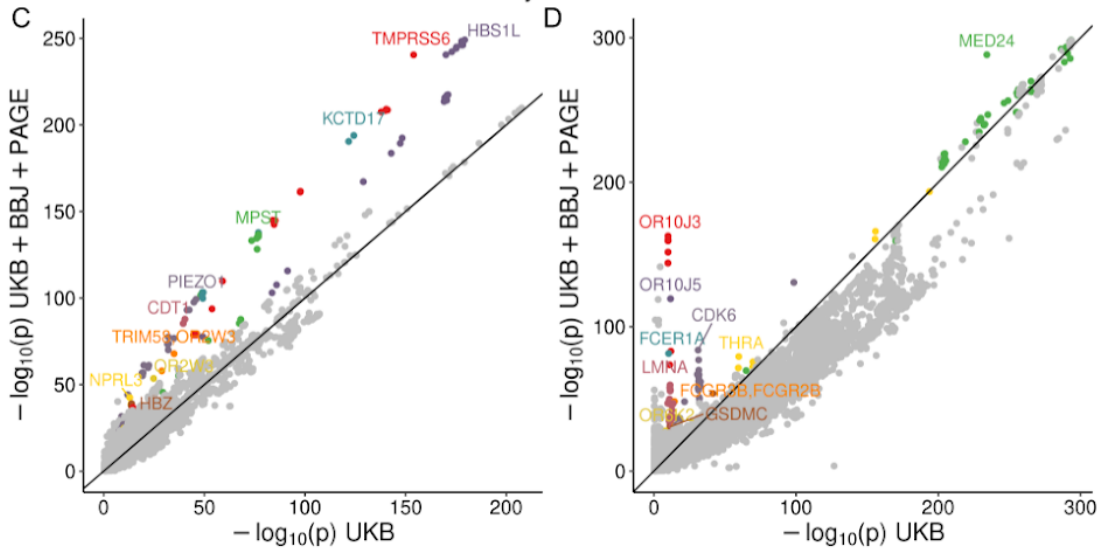

568 **Figure 4 - PRS accuracy and corresponding genetic variant contributions for up to 34 traits within and**  
569 **across diverse ancestries.** A) PRS accuracy relative to European ancestry individuals in diverse target  
570 ancestries. Discovery data consisted of GWAS summary statistics from UK Biobank (UKB) European ancestry  
571 data. Target data consisted of globally diverse continental ancestries (including withheld European target  
572 individuals) and regional African ancestry participants from UKB, or unrelated individuals from the Uganda  
573 GPC cohort. Traits were filtered to those with a 95% confidence interval range in PRS accuracy  $< 0.08$ . B) PRS  
574 accuracy from a homogeneous versus multi-ancestry discovery dataset. GWAS discovery data consisted of  
575 summary statistics from UKB European ancestry data only or from the meta-analysis of UKB, BioBank Japan  
576 (BBJ), and Population Architecture using Genomics and Epidemiology (PAGE). Target populations are from the  
577 UKB. Lines connect the 10 traits available in both discovery cohorts to indicate how accuracy changed for the  
578 same trait in the UKB only versus meta-analyzed discovery data, while half violin plots show the distribution  
579 across all phenotypes in each discovery cohort. When lines are missing, the trait is absent in PAGE. Trait  
580 outliers are labeled in text and with solid lines. A-B) Relative PRS accuracies are compared to the maximum  
581 for each trait in target samples withheld from discovery consisting of UKB European ancestry individuals. To  
582 simplify comparisons, only the polygenic scores with the highest prediction accuracy are shown here. Colors in  
583 these two panels correspond to the same continental ancestries. C-D) Trait-specific genetic outlier plots.  
584 QQ-like plot showing p-values in UKB only versus multi-cohort meta-analysis of UKB, BBJ, and PAGE. The ten  
585 regions that are genome-wide significant in both dataset and show the most significant differences are colored  
586 and labeled for: C) MCHC, and D) WBC.

## 587 References

588

- 589 1000 Genomes Project Consortium, Auton, A., Brooks, L.D., Durbin, R.M., Garrison, E.P., Kang, H.M., Korbel,  
590 J.O., Marchini, J.L., McCarthy, S., McVean, G.A., et al. (2015). A global reference for human genetic variation.  
591 *Nature* 526, 68–74.
- 592 All of Us Research Program Investigators, Denny, J.C., Rutter, J.L., Goldstein, D.B., Philippakis, A., Smoller,  
593 J.W., Jenkins, G., and Dishman, E. (2019). The “All of Us” Research Program. *N. Engl. J. Med.* 381, 668–676.
- 594 Asiki, G., Murphy, G., Nakiyingi-Miir, J., Seeley, J., Nsubuga, R.N., Karabarinde, A., Waswa, L., Biraro, S.,  
595 Kasamba, I., Pomilla, C., et al. (2013). The general population cohort in rural south-western Uganda: a  
596 platform for communicable and non-communicable disease studies. *Int. J. Epidemiol.* 42, 129–141.
- 597 Astle, W.J., Elding, H., Jiang, T., Allen, D., Ruklisa, D., Mann, A.L., Mead, D., Bouman, H., Riveros-Mckay, F.,  
598 Kostadima, M.A., et al. (2016). The Allelic Landscape of Human Blood Cell Trait Variation and Links to  
599 Common Complex Disease. *Cell* 167, 1415–1429.e19.
- 600 Barcellos, S.H., Carvalho, L.S., and Turley, P. (2018). Education can reduce health differences related to  
601 genetic risk of obesity. *Proc. Natl. Acad. Sci. U. S. A.* 115, E9765–E9772.
- 602 Bentley, A.R., Callier, S.L., and Rotimi, C.N. (2020). Evaluating the promise of inclusion of African ancestry  
603 populations in genomics. *Npj Genomic Medicine* 5.
- 604 Benyamin, B., Ferreira, M.A.R., Willemsen, G., Gordon, S., Middelberg, R.P.S., McEvoy, B.P., Hottenga, J.-J.,  
605 Henders, A.K., Campbell, M.J., Wallace, L., et al. (2009). Common variants in TMPRSS6 are associated with  
606 iron status and erythrocyte volume. *Nat. Genet.* 41, 1173–1175.

- 607 Bigdeli, T.B., Genovese, G., Georgakopoulos, P., Meyers, J.L., Peterson, R.E., Iyegbe, C.O., Medeiros, H.,  
608 Valderrama, J., Achtyes, E.D., Kotov, R., et al. (2019). Contributions of common genetic variants to risk of  
609 schizophrenia among individuals of African and Latino ancestry. *Mol. Psychiatry*.
- 610 Bitarello, B.D., and Mathieson, I. (2020). Polygenic Scores for Height in Admixed Populations. *G3* 10,  
611 4027–4036.
- 612 Brown, B.C., Asian Genetic Epidemiology Network Type 2 Diabetes Consortium, Ye, C.J., Price, A.L., and  
613 Zaitlen, N. (2016). Transethnic Genetic-Correlation Estimates from Summary Statistics. *Am. J. Hum. Genet.*  
614 99, 76–88.
- 615 Bulik-Sullivan, B.K., Loh, P.-R., Finucane, H.K., Ripke, S., Yang, J., Schizophrenia Working Group of the  
616 Psychiatric Genomics Consortium, Patterson, N., Daly, M.J., Price, A.L., and Neale, B.M. (2015). LD Score  
617 regression distinguishes confounding from polygenicity in genome-wide association studies. *Nat. Genet.* 47,  
618 291–295.
- 619 Busby, G.B., Band, G., Si Le, Q., Jallow, M., Bougama, E., Mangano, V.D., Amenga-Etego, L.N., Enimil, A.,  
620 Apinjoh, T., Ndila, C.M., et al. (2016). Admixture into and within sub-Saharan Africa. *Elife* 5.
- 621 Bycroft, C., Freeman, C., Petkova, D., Band, G., Elliott, L.T., Sharp, K., Motyer, A., Vukcevic, D., Delaneau, O.,  
622 O'Connell, J., et al. (2018). The UK Biobank resource with deep phenotyping and genomic data. *Nature* 562,  
623 203–209.
- 624 Campbell, M.C., and Tishkoff, S.A. (2008). African genetic diversity: implications for human demographic  
625 history, modern human origins, and complex disease mapping. *Annu. Rev. Genomics Hum. Genet.* 9,  
626 403–433.
- 627 Cerdeña, J.P., Plaisime, M.V., and Tsai, J. (2020). From race-based to race-conscious medicine: how  
628 anti-racist uprisings call us to act. *Lancet* 396, 1125–1128.
- 629 Chambers, J.C., Zhang, W., Li, Y., Sehmi, J., Wass, M.N., Zabaneh, D., Hoggart, C., Bayele, H., McCarthy,  
630 M.I., Peltonen, L., et al. (2009). Genome-wide association study identifies variants in *TMPRSS6* associated  
631 with hemoglobin levels. *Nat. Genet.* 41, 1170–1172.
- 632 Chang, C.C., Chow, C.C., Tellier, L.C., Vattikuti, S., Purcell, S.M., and Lee, J.J. (2015). Second-generation  
633 PLINK: rising to the challenge of larger and richer datasets. *Gigascience* 4, 7.
- 634 Choudhury, A., Aron, S., Botigué, L.R., Sengupta, D., Botha, G., Bensellak, T., Wells, G., Kumuthini, J.,  
635 Shriner, D., Fakim, Y.J., et al. (2020). High-depth African genomes inform human migration and health. *Nature*  
636 586, 741–748.
- 637 Duncan, L.E., Ratanatharathorn, A., Aiello, A.E., Almlí, L.M., Amstadter, A.B., Ashley-Koch, A.E., Baker, D.G.,  
638 Beckham, J.C., Bierut, L.J., Bisson, J., et al. (2018). Largest GWAS of PTSD (N=20 070) yields genetic overlap  
639 with schizophrenia and sex differences in heritability. *Mol. Psychiatry* 23, 666–673.
- 640 E, W., Wheeler, E., Leong, A., Liu, C.T., Hievert, M.F., Strawbridge, R., and Podmore, C. (2018). Impact of  
641 common genetic determinants of Hemoglobin A1c on type 2 diabetes risk and diagnosis in ancestrally diverse  
642 populations: A transethnic genome-wide meta-analysis. *Yearbook of Paediatric Endocrinology*.
- 643 Genovese, G., Friedman, D.J., Ross, M.D., Lecordier, L., Uzureau, P., Freedman, B.I., Bowden, D.W.,  
644 Langefeld, C.D., Oleksyk, T.K., Uscinski Knob, A.L., et al. (2010). Association of trypanolytic ApoL1 variants

- 645 with kidney disease in African Americans. *Science* 329, 841–845.
- 646 Ginther, D.K., Schaffer, W.T., Schnell, J., Masimore, B., Liu, F., Haak, L.L., and Kington, R. (2011). Race,  
647 ethnicity, and NIH research awards. *Science* 333, 1015–1019.
- 648 Gurdasani, D., Carstensen, T., Tekola-Ayele, F., Pagani, L., Tachmazidou, I., Hatzikotoulas, K., Karthikeyan, S.,  
649 Iles, L., Pollard, M.O., Choudhury, A., et al. (2015). The African Genome Variation Project shapes medical  
650 genetics in Africa. *Nature* 517, 327–332.
- 651 Gurdasani, D., Carstensen, T., Fatumo, S., Chen, G., Franklin, C.S., Prado-Martinez, J., Bouman, H., Abascal,  
652 F., Haber, M., Tachmazidou, I., et al. (2019). Uganda Genome Resource Enables Insights into Population  
653 History and Genomic Discovery in Africa. *Cell* 179, 984–1002.e36.
- 654 Hamrick, K. (2019). Women, minorities, and persons with disabilities in science and engineering: 2019.  
655 National Science Foundation, National Center for Science and Engineering Statistics (NCSES), Alexandria,  
656 VA, Special Report NSF 19–304.
- 657 He, Y., Lakhani, C.M., Manrai, A.K., and Patel, C.J. (2019). Poly-Exposure and Poly-Genomic Scores Implicate  
658 Prominent Roles of Non-Genetic and Demographic Factors in Four Common Diseases in the UK.
- 659 of Health, U.S.D., Services, H., and Others (2017). 2016 National Healthcare Quality and Disparities Report.
- 660 Heckerman, D., Gurdasani, D., Kadie, C., Pomilla, C., Carstensen, T., Martin, H., Ekoru, K., Nsubuga, R.N.,  
661 Ssenyomo, G., Kamali, A., et al. (2016). Linear mixed model for heritability estimation that explicitly addresses  
662 environmental variation. *Proc. Natl. Acad. Sci. U. S. A.* 113, 7377–7382.
- 663 Henn, B.M., Gignoux, C.R., Jobin, M., Granka, J.M., Macpherson, J.M., Kidd, J.M., Rodríguez-Botigué, L.,  
664 Ramachandran, S., Hon, L., Brisbin, A., et al. (2011). Hunter-gatherer genomic diversity suggests a southern  
665 African origin for modern humans. *Proc. Natl. Acad. Sci. U. S. A.* 108, 5154–5162.
- 666 Henn, B.M., Cavalli-Sforza, L.L., and Feldman, M.W. (2012a). The great human expansion. *Proc. Natl. Acad.*  
667 *Sci. U. S. A.* 109, 17758–17764.
- 668 Henn, B.M., Botigué, L.R., Gravel, S., Wang, W., Brisbin, A., Byrnes, J.K., Fadhlouzi-Zid, K., Zalloua, P.A.,  
669 Moreno-Estrada, A., Bertranpetit, J., et al. (2012b). Genomic ancestry of North Africans supports back-to-Africa  
670 migrations. *PLoS Genet.* 8, e1002397.
- 671 Hero, J.O., Zaslavsky, A.M., and Blendon, R.J. (2017). The United States Leads Other Nations In Differences  
672 By Income In Perceptions Of Health And Health Care. *Health Aff.* 36, 1032–1040.
- 673 Hindorff, L.A., Bonham, V.L., Brody, L.C., Ginoza, M.E.C., Hutter, C.M., Manolio, T.A., and Green, E.D. (2018).  
674 Prioritizing diversity in human genomics research. *Nat. Rev. Genet.* 19, 175–185.
- 675 Hodgson, J.A., Mulligan, C.J., Al-Meerri, A., and Raaum, R.L. (2014). Early back-to-Africa migration into the  
676 Horn of Africa. *PLoS Genet.* 10, e1004393.
- 677 Hoppe, T.A., Litovitz, A., Willis, K.A., Meseroll, R.A., Perkins, M.J., Hutchins, B.I., Davis, A.F., Lauer, M.S.,  
678 Valentine, H.A., Anderson, J.M., et al. (2019). Topic choice contributes to the lower rate of NIH awards to  
679 African-American/black scientists. *Sci Adv* 5, eaaw7238.
- 680 Howrigan, D. (2017). Details and Considerations of the UK Biobank GWAS.



- 681 International Schizophrenia Consortium, Purcell, S.M., Wray, N.R., Stone, J.L., Visscher, P.M., O'Donovan,  
682 M.C., Sullivan, P.F., and Sklar, P. (2009). Common polygenic variation contributes to risk of schizophrenia and  
683 bipolar disorder. *Nature* **460**, 748–752.
- 684 Kerminen, S., Martin, A.R., Koskela, J., Ruotsalainen, S.E., Havulinna, A.S., Surakka, I., Palotie, A., Perola,  
685 M., Salomaa, V., Daly, M.J., et al. (2019). Geographic Variation and Bias in the Polygenic Scores of Complex  
686 Diseases and Traits in Finland. *Am. J. Hum. Genet.* **104**, 1169–1181.
- 687 Khera, A.V., Chaffin, M., Aragam, K.G., Haas, M.E., Roselli, C., Choi, S.H., Natarajan, P., Lander, E.S., Lubitz,  
688 S.A., Ellinor, P.T., et al. (2018). Genome-wide polygenic scores for common diseases identify individuals with  
689 risk equivalent to monogenic mutations. *Nat. Genet.* **50**, 1219–1224.
- 690 Knowles, J.W., and Ashley, E.A. (2018). Cardiovascular disease: The rise of the genetic risk score. *PLoS Med.*  
691 **15**, e1002546.
- 692 Kuchenbaecker, K., Telkar, N., Reiker, T., Walters, R.G., Lin, K., Eriksson, A., Gurdasani, D., Gilly, A.,  
693 Southam, L., Tsfantakis, E., et al. (2019). The transferability of lipid loci across African, Asian and European  
694 cohorts. *Nat. Commun.* **10**, 4330.
- 695 Lam, M., Chen, C.-Y., Li, Z., Martin, A.R., Bryois, J., Ma, X., Gaspar, H., Ikeda, M., Benyamin, B., Brown, B.C.,  
696 et al. (2019). Comparative genetic architectures of schizophrenia in East Asian and European populations. *Nat.*  
697 *Genet.* 1–9.
- 698 Lam, M., Awasthi, S., Watson, H.J., Goldstein, J., Panagiotaropoulou, G., Trubetskoy, V., Karlsson, R., Frei, O.,  
699 Fan, C.-C., De Witte, W., et al. (2020). RICOPILI: Rapid Imputation for CONsortias PIpeLine. *Bioinformatics* **36**,  
700 930–933.
- 701 Lettre, G., Sankaran, V.G., Bezerra, M.A.C., Araújo, A.S., Uda, M., Sanna, S., Cao, A., Schlessinger, D.,  
702 Costa, F.F., Hirschhorn, J.N., et al. (2008). DNA polymorphisms at the BCL11A, HBS1L-MYB, and  $\beta$ -globin loci  
703 associate with fetal hemoglobin levels and pain crises in sickle cell disease. *Proc. Natl. Acad. Sci. U. S. A.* **105**,  
704 11869–11874.
- 705 Li, J.Z., Absher, D.M., Tang, H., Southwick, A.M., Casto, A.M., Ramachandran, S., Cann, H.M., Barsh, G.S.,  
706 Feldman, M., Cavalli-Sforza, L.L., et al. (2008). Worldwide human relationships inferred from genome-wide  
707 patterns of variation. *Science* **319**, 1100–1104.
- 708 Manrai, A.K., Funke, B.H., Rehm, H.L., Olesen, M.S., Maron, B.A., Szolovits, P., Margulies, D.M., Loscalzo, J.,  
709 and Kohane, I.S. (2016). Genetic Misdiagnoses and the Potential for Health Disparities. *N. Engl. J. Med.* **375**,  
710 655–665.
- 711 Martin, A.R., Gignoux, C.R., Walters, R.K., Wojcik, G.L., Neale, B.M., Gravel, S., Daly, M.J., Bustamante, C.D.,  
712 and Kenny, E.E. (2017). Human Demographic History Impacts Genetic Risk Prediction across Diverse  
713 Populations. *Am. J. Hum. Genet.* **100**, 635–649.
- 714 Martin, A.R., Teferra, S., Möller, M., Hoal, E.G., and Daly, M.J. (2018). The critical needs and challenges for  
715 genetic architecture studies in Africa. *Curr. Opin. Genet. Dev.* **53**, 113–120.
- 716 Martin, A.R., Kanai, M., Kamatani, Y., Okada, Y., Neale, B.M., and Daly, M.J. (2019). Clinical use of current  
717 polygenic risk scores may exacerbate health disparities. *Nat. Genet.* **51**, 584–591.
- 718 van der Merwe, C., Mwesiga, E.K., McGregor, N.W., Ejigu, A., Tilahun, A.W., Kalungi, A., Akimana, B., Dubale,  
719 B.W., Omari, F., Mmochi, J., et al. (2018). Advancing neuropsychiatric genetics training and collaboration in

- 720 Africa. *Lancet Glob Health* 6, e246–e247.
- 721 Morales, J., Welter, D., Bowler, E.H., Cerezo, M., Harris, L.W., McMahon, A.C., Hall, P., Junkins, H.A., Milano,  
722 A., Hastings, E., et al. (2018). A standardized framework for representation of ancestry data in genomics  
723 studies, with application to the NHGRI-EBI GWAS Catalog. *Genome Biol.* 19, 21.
- 724 Mostafavi, H., Harpak, A., Agarwal, I., Conley, D., Pritchard, J.K., and Przeworski, M. (2020). Variable  
725 prediction accuracy of polygenic scores within an ancestry group. *Elife* 9.
- 726 Mugisha, J.O., Baisley, K., Asiki, G., Seeley, J., and Kuper, H. (2013). Prevalence, types, risk factors and  
727 clinical correlates of anaemia in older people in a rural Ugandan population. *PLoS One* 8, e78394.
- 728 Mugisha, J.O., Seeley, J., and Kuper, H. (2016). Population based haematology reference ranges for old  
729 people in rural South-West Uganda. *BMC Res. Notes* 9, 433.
- 730 Mulder, N., Abimiku, A. 'le, Adebamowo, S.N., de Vries, J., Matimba, A., Olowoyo, P., Ramsay, M., Skelton, M.,  
731 and Stein, D.J. (2018). H3Africa: current perspectives. *Pharmgenomics. Pers. Med.* 11, 59–66.
- 732 Nagai, A., Hirata, M., Kamatani, Y., Muto, K., Matsuda, K., Kiyohara, Y., Ninomiya, T., Tamakoshi, A.,  
733 Yamagata, Z., Mushiroda, T., et al. (2017). Overview of the BioBank Japan Project: Study design and profile. *J.*  
734 *Epidemiol.* 27, S2–S8.
- 735 Nalwanga, D., Musiime, V., Kizito, S., Kiggundu, J.B., Batte, A., Musoke, P., and Tumwine, J.K. (2020).  
736 Mortality among children under five years admitted for routine care of severe acute malnutrition: a prospective  
737 cohort study from Kampala, Uganda. *BMC Pediatr.* 20, 182.
- 738 Novembre, J., and Barton, N.H. (2018). Tread Lightly Interpreting Polygenic Tests of Selection. *Genetics* 208,  
739 1351–1355.
- 740 Obermeyer, Z., Powers, B., Vogeli, C., and Mullainathan, S. (2019). Dissecting racial bias in an algorithm used  
741 to manage the health of populations. *Science* 366, 447–453.
- 742 Pagani, L., Schiffels, S., Gurdasani, D., Danecek, P., Scally, A., Chen, Y., Xue, Y., Haber, M., Ekong, R., Oljira,  
743 T., et al. (2015). Tracing the route of modern humans out of Africa by using 225 human genome sequences  
744 from Ethiopians and Egyptians. *Am. J. Hum. Genet.* 96, 986–991.
- 745 Popejoy, A.B., and Fullerton, S.M. (2016). Genomics is failing on diversity. *Nature News* 538, 161.
- 746 Roser, M. (2013). Life expectancy. *Our World in Data*.
- 747 Rotimi, C.N., Bentley, A.R., Doumatey, A.P., Chen, G., Shriner, D., and Adeyemo, A. (2017). The genomic  
748 landscape of African populations in health and disease. *Hum. Mol. Genet.* 26, R225–R236.
- 749 Schoech, A.P., Jordan, D.M., Loh, P.-R., Gazal, S., O'Connor, L.J., Balick, D.J., Palamara, P.F., Finucane, H.K.,  
750 Sunyaev, S.R., and Price, A.L. (2019). Quantification of frequency-dependent genetic architectures in 25 UK  
751 Biobank traits reveals action of negative selection. *Nat. Commun.* 10, 790.
- 752 Scutari, M., Mackay, I., and Balding, D. (2016). Using Genetic Distance to Infer the Accuracy of Genomic  
753 Prediction. *PLoS Genet.* 12, e1006288.
- 754 Shi, H., Burch, K.S., Johnson, R., Freund, M.K., Kichaev, G., Mancuso, N., Manuel, A.M., Dong, N., and  
755 Pasaniuc, B. (2020). Localizing Components of Shared Transethnic Genetic Architecture of Complex Traits

- 756 from GWAS Summary Data. *Am. J. Hum. Genet.* *106*, 805–817.
- 757 Sirugo, G., Williams, S.M., and Tishkoff, S.A. (2019). The Missing Diversity in Human Genetic Studies. *Cell*  
758 *177*, 26–31.
- 759 Stein, D.J., Koen, N., Donald, K.A., Adnams, C.M., Koopowitz, S., Lund, C., Marais, A., Myers, B., Roos, A.,  
760 Sorsdahl, K., et al. (2015). Investigating the psychosocial determinants of child health in Africa: The  
761 Drakenstein Child Health Study. *J. Neurosci. Methods* *252*, 27–35.
- 762 Stevenson, A., Akena, D., Stroud, R.E., Atwoli, L., Campbell, M.M., Chibnik, L.B., Kwobah, E., Kariuki, S.M.,  
763 Martin, A.R., de Menil, V., et al. (2019). Neuropsychiatric Genetics of African Populations-Psychosis  
764 (NeuroGAP-Psychosis): a case-control study protocol and GWAS in Ethiopia, Kenya, South Africa and  
765 Uganda. *BMJ Open* *9*, e025469.
- 766 Uren, C., Kim, M., Martin, A.R., Bobo, D., Gignoux, C.R., van Helden, P.D., Möller, M., Hoal, E.G., and Henn,  
767 B.M. (2016). Fine-Scale Human Population Structure in Southern Africa Reflects Ecogeographic Boundaries.  
768 *Genetics* *204*, 303–314.
- 769 Visscher, P.M., Wray, N.R., Zhang, Q., Sklar, P., McCarthy, M.I., Brown, M.A., and Yang, J. (2017). 10 Years of  
770 GWAS Discovery: Biology, Function, and Translation. *Am. J. Hum. Genet.* *101*, 5–22.
- 771 de Vlaming, R., Okbay, A., Rietveld, C.A., Johannesson, M., Magnusson, P.K.E., Uitterlinden, A.G., van Rooij,  
772 F.J.A., Hofman, A., Groenen, P.J.F., Thurik, A.R., et al. (2017). Meta-GWAS Accuracy and Power (MetaGAP)  
773 Calculator Shows that Hiding Heritability Is Partially Due to Imperfect Genetic Correlations across Studies.  
774 *PLoS Genet.* *13*, e1006495.
- 775 Wang, Y., Guo, J., Ni, G., Yang, J., Visscher, P.M., and Yengo, L. (2020). Theoretical and empirical  
776 quantification of the accuracy of polygenic scores in ancestry divergent populations.
- 777 Wojcik, G.L., Graff, M., Nishimura, K.K., Tao, R., Haessler, J., Gignoux, C.R., Highland, H.M., Patel, Y.M.,  
778 Sorokin, E.P., Avery, C.L., et al. (2019). Genetic analyses of diverse populations improves discovery for  
779 complex traits. *Nature*.
- 780 Wray, N.R., Yang, J., Hayes, B.J., Price, A.L., Goddard, M.E., and Visscher, P.M. (2013). Pitfalls of predicting  
781 complex traits from SNPs. *Nat. Rev. Genet.* *14*, 507–515.
- 782 Zaidi, A.A., and Mathieson, I. (2020). Demographic history impacts stratification in polygenic scores.
- 783 Zar, H.J., Barnett, W., Myer, L., Stein, D.J., and Nicol, M.P. (2015). Investigating the early-life determinants of  
784 illness in Africa: the Drakenstein Child Health Study. *Thorax* *70*, 592–594.
- 785 Zar, H.J., Pellowski, J.A., Cohen, S., Barnett, W., Vanker, A., Koen, N., and Stein, D.J. (2019). Maternal health  
786 and birth outcomes in a South African birth cohort study. *PLoS One* *14*, e0222399.

787
